# Supplementary material for: Shoot- and root-borne cytokinin influences arbuscular mycorrhizal symbiosis
Source: PubMed Central journal article supplement (PMC5034000; doi:10.1007/s00572-016-0706-3), 2016-05-19
Supplement: 572_2016_706_MOESM1_ESM.pdf [file 572_2016_706_MOESM1_ESM.pdf]

**Supplemental Table 1.** Primers used for quantitative real-time RT-PCR.

| <b>Gene name</b>                 | <b>Gene bank accession No.</b> | <b>Primer sequence</b>                                           |
|----------------------------------|--------------------------------|------------------------------------------------------------------|
| <i>NtEF-1<math>\alpha</math></i> | AF120093                       | 5'- TGAGATGCACCACGAAGCTC -3'<br>5'- CCAACATTGTCACCAGGAAGTG -3'   |
| <i>NtL25</i>                     | L18908                         | 5'- CCCCTCACCACAGAGTCTGC -3'<br>5'- AAGGGTGTTGTTGTCCTCAATCTT -3' |
| <i>NtPT1</i>                     | AB020061                       | 5'- AGCGTTCATTGCTGCTGTTT -3'<br>5'- AGAGCGTCGGCATGATATGT -3'     |
| <i>NtPT4</i>                     | EF091672                       | 5'- GTCAACTCGTGGGGCGTTTAT -3'<br>5'- CTCAGGCTCCGTGGACAAAAT -3'   |
