# Supplementary material for: Shoot- and root-borne cytokinin influences arbuscular mycorrhizal symbiosis
Source: PubMed Central journal article supplement (PMC5034000; doi:10.1007/s00572-016-0706-3), 2016-05-19
Supplement: 572_2016_706_MOESM2_ESM.pdf [file 572_2016_706_MOESM2_ESM.pdf]

**Supplemental Table 2.** Results of two-way ANOVAs on AM hyphae and arbuscules colonization in tobacco roots with the categorical factors tobacco lines (four levels: WT, W6:CKX1, 35S:CKX1 or 35S:CKX2) and AM inoculation (three levels: strain RI, FM or both RI and FM). For the mean values see Fig. 1.

| Factors             | df  | Hyphae      |          | Arbuscules |          |
|---------------------|-----|-------------|----------|------------|----------|
|                     |     | <i>F</i>    | <i>P</i> | <i>F</i>   | <i>P</i> |
| Tobacco lines (T)   | 3   | <b>32.7</b> | ***      | <b>9.2</b> | ***      |
| AM inoculation (AM) | 2   | 2.6         | (*)      | 0.8        |          |
| T x AM              | 6   | 1.1         |          | 2.0        | (*)      |
| Residuals           | 108 |             |          |            |          |

AM, arbuscular mycorrhizal. WT, wild type. df, degrees of freedom.

For  $P < 0.05$ , 0.01 and 0.001, significance levels of  $F$  values are presented as \*, \*\* and \*\*\*, respectively, and are in bold.  $F$  values accompanied by (\*) are marginally non-significant ( $P < 0.100$ ) and are in italic.
