# Supplementary material for: Shoot- and root-borne cytokinin influences arbuscular mycorrhizal symbiosis
Source: PubMed Central journal article supplement (PMC5034000; doi:10.1007/s00572-016-0706-3), 2016-05-19
Supplement: 572_2016_706_MOESM3_ESM.pdf [file 572_2016_706_MOESM3_ESM.pdf]

**Supplemental Table 3.** Results of three-way ANOVAs on root and shoot DW and on number of flowers in tobacco plants with the categorical factors tobacco lines (four levels: WT, W6:CKX1, 35S:CKX1 or 35S:CKX2), *R. irregularis* RI (two levels: -, +), and *R. irregularis* FM (two levels: -, +). For the mean values see Fig. 2.

| Factors                  | df  | Root DW     |          | Shoot DW     |          | Number of flowers |          |
|--------------------------|-----|-------------|----------|--------------|----------|-------------------|----------|
|                          |     | <i>F</i>    | <i>P</i> | <i>F</i>     | <i>P</i> | <i>F</i>          | <i>P</i> |
| Tobacco line (T)         | 3   | <b>10.8</b> | ***      | <b>132.2</b> | ***      | <b>59.8</b>       | ***      |
| <i>R. irregularis</i> RI | 1   | <b>18.1</b> | ***      | <b>23.0</b>  | ***      | <b>29.2</b>       | ***      |
| <i>R. irregularis</i> FM | 1   | 2.6         |          | <b>8.7</b>   | **       | 1.0               |          |
| T x RI                   | 3   | <b>3.3</b>  | *        | <b>2.7</b>   | *        | <b>3.6</b>        | *        |
| T x FM                   | 3   | 2.6         | (*)      | <b>20.3</b>  | ***      | <b>15.7</b>       | ***      |
| RI x FM                  | 1   | 1.7         |          | <b>5.2</b>   | *        | 0.1               |          |
| T x RI x FM              | 3   | 2.5         | (*)      | <b>8.6</b>   | ***      | <b>19.4</b>       | ***      |
| Residuals                | 144 |             |          |              |          |                   |          |

DW, dry weight. WT, wild type. df, degrees of freedom.

For  $P < 0.05$ , 0.01 and 0.001, significance levels of *F* values are presented as \*, \*\* and \*\*\*, respectively, and are in bold. *F* values accompanied by (\*) are marginally non-significant and are in italic.
