# Supplementary material for: Shoot- and root-borne cytokinin influences arbuscular mycorrhizal symbiosis
Source: PubMed Central journal article supplement (PMC5034000; doi:10.1007/s00572-016-0706-3), 2016-05-19
Supplement: 572_2016_706_MOESM4_ESM.pdf [file 572_2016_706_MOESM4_ESM.pdf]

**Supplemental Table 4.** Results of three-way ANOVAs on concentration of P, N and C and content of P and N in shoots with the categorical factors tobacco lines (four levels: WT, W6:CKX1, 35S:CKX1 or 35S:CKX2), *R. irregularis* RI (two levels: -, +), and *R. irregularis* FM (two levels: -, +). For the mean values see Fig. 3.

| Factors                  | df | P concentration |          | df  | P total content |          | N concentration |          | N total content |          | C concentration |          |
|--------------------------|----|-----------------|----------|-----|-----------------|----------|-----------------|----------|-----------------|----------|-----------------|----------|
|                          |    | <i>F</i>        | <i>P</i> |     | <i>F</i>        | <i>P</i> | <i>F</i>        | <i>P</i> | <i>F</i>        | <i>P</i> | <i>F</i>        | <i>P</i> |
| Tobacco line (T)         | 3  | <b>104.5</b>    | ***      | 3   | <b>7.0</b>      | ***      | <b>111.5</b>    | ***      | <b>12.2</b>     | ***      | <b>69.7</b>     | ***      |
| <i>R. irregularis</i> RI | 1  | <b>42.2</b>     | ***      | 1   | 4.0             | (*)      | <b>19.0</b>     | ***      | 0.0             |          | 0.0             |          |
| <i>R. irregularis</i> FM | 1  | <b>5.5</b>      | *        | 1   | 0.6             |          | <b>9.0</b>      | **       | 0.2             |          | 0.1             |          |
| T x RI                   | 3  | <b>6.0</b>      | **       | 3   | 1.2             |          | <b>6.2</b>      | ***      | 2.6             | (*)      | 1.4             |          |
| T x FM                   | 3  | <b>7.4</b>      | ***      | 3   | 0.1             |          | <b>14.9</b>     | ***      | 0.7             |          | <b>3.3</b>      | *        |
| RI x FM                  | 1  | 0.0             |          | 1   | 0.1             |          | 0.1             |          | 3.8             | (*)      | 0.0             |          |
| T x RI x FM              | 3  | <b>13.8</b>     | ***      | 3   | 2.0             |          | <b>10.0</b>     | ***      | <b>3.8</b>      | *        | 1.9             |          |
| Residuals                | 64 |                 |          | 144 |                 |          |                 |          |                 |          |                 |          |

P, phosphorus. N, nitrogen. C, carbon. WT, wild type. df, degrees of freedom.

For  $P < 0.05$ , 0.01 and 0.001, significance levels of *F* values are presented as \*, \*\* and \*\*\*, respectively, and are in bold. *F* values accompanied by (\*) are marginally non-significant and are in italic.  $n = 5$  for P and  $n = 10$  for N and C.
