# Supplementary material for: Shoot- and root-borne cytokinin influences arbuscular mycorrhizal symbiosis
Source: PubMed Central journal article supplement (PMC5034000; doi:10.1007/s00572-016-0706-3), 2016-05-19
Supplement: 572_2016_706_MOESM5_ESM.pdf [file 572_2016_706_MOESM5_ESM.pdf]

**Supplemental Table 5.** Results of three-way ANOVAs on *NtPT4* and *NtPT1* transcript levels with the categorical factors tobacco lines (four levels: WT, W6:CKX1, 35S:CKX1 or 35S:CKX2), *R. irregularis* RI (two levels: -, +), and *R. irregularis* FM (two levels: -, +). For the mean values see Fig. 5.

| Factors                  | df | <i>NtPT4</i> |          | <i>NtPT1</i> |          |
|--------------------------|----|--------------|----------|--------------|----------|
|                          |    | <i>F</i>     | <i>P</i> | <i>F</i>     | <i>P</i> |
| Tobacco line (T)         | 3  | <b>11.9</b>  | ***      | 1.2          |          |
| <i>R. irregularis</i> RI | 1  | <b>22.4</b>  | ***      | <b>7.9</b>   | **       |
| <i>R. irregularis</i> FM | 1  | <b>55.3</b>  | ***      | 2.6          |          |
| T x RI                   | 3  | 1.9          |          | 2.2          |          |
| T x FM                   | 3  | <b>4.0</b>   | *        | <b>4.4</b>   | *        |
| RI x FM                  | 1  | <b>43.6</b>  | ***      | 0.0          |          |
| T x RI x FM              | 3  | 1.2          |          | <b>4.2</b>   | *        |
| Residuals                | 30 |              |          |              |          |

*NtPT4*, *Nicotiana tabacum phosphate transporter4*. *NtPT1*, *Nicotiana tabacum phosphate transporter1*. WT, wild type. df, degrees of freedom.

For  $P < 0.05$ , 0.01 and 0.001, significance levels of *F* values are presented as \*, \*\* and \*\*\*, respectively, and are in bold. *F* values accompanied by (\*) are marginally non-significant and are in italic.
